# Supplementary material for: Dabrafenib Alters MDSC Differentiation and Function by Activation of GCN2
Source: PubMed Central journal article supplement (PMC10936428; doi:10.1158/2767-9764.crc-23-0376), 2024-03-13
Supplement: crc-23-0376-s01.pdf [file crc-23-0376-s01.pdf]

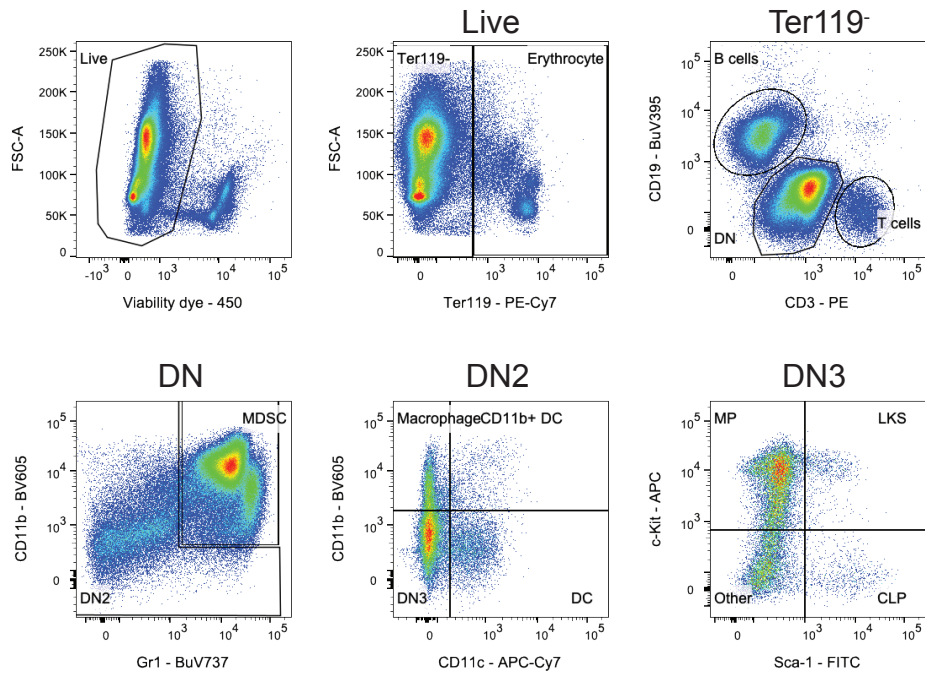

**Supplementary Figure s1.** Gating strategy used to analyze immune cell subpopulation in fresh bone marrow and MDSCs in vitro cultures.
