# Supplementary material for: Dabrafenib Alters MDSC Differentiation and Function by Activation of GCN2
Source: PubMed Central journal article supplement (PMC10936428; doi:10.1158/2767-9764.crc-23-0376), 2024-03-13
Supplement: crc-23-0376-s02.pdf [file crc-23-0376-s02.pdf]

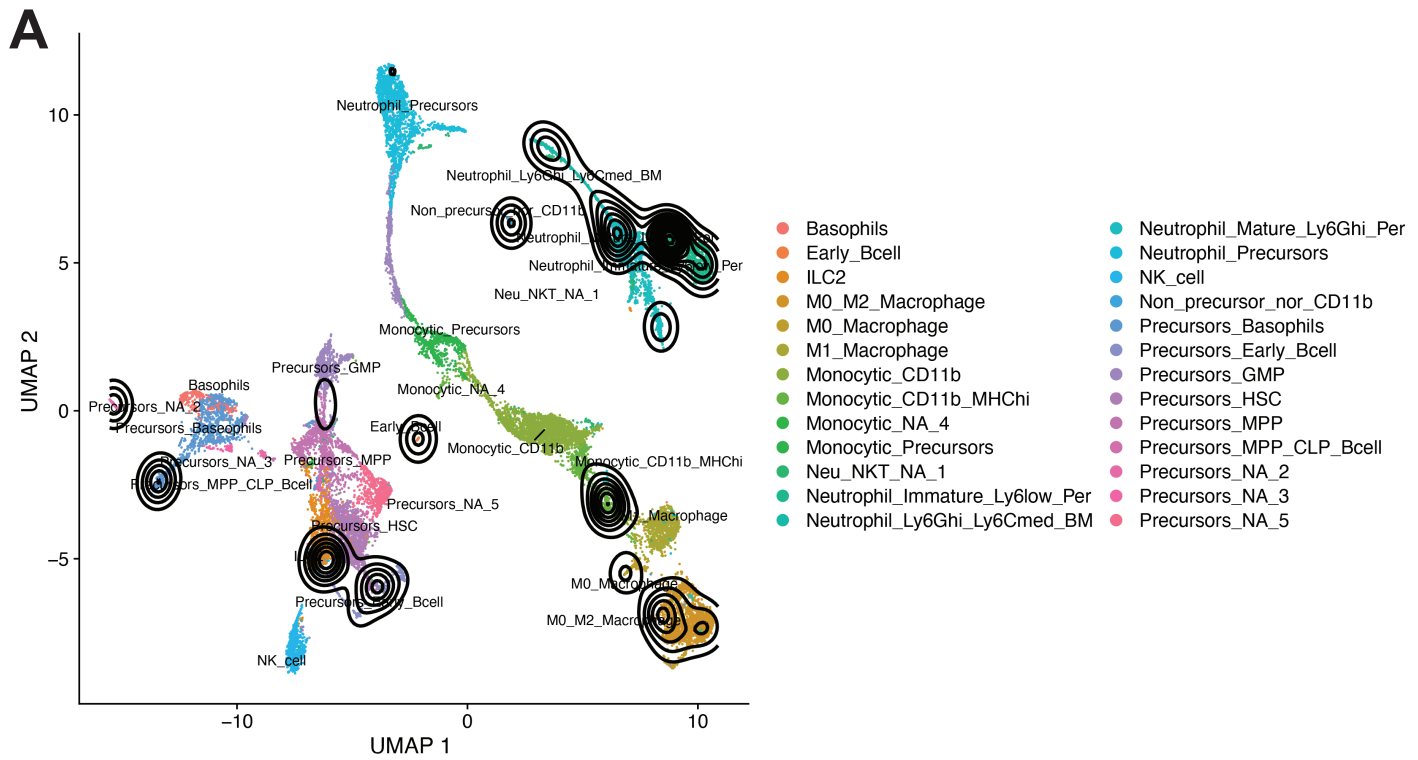

**B**

Reference clusters

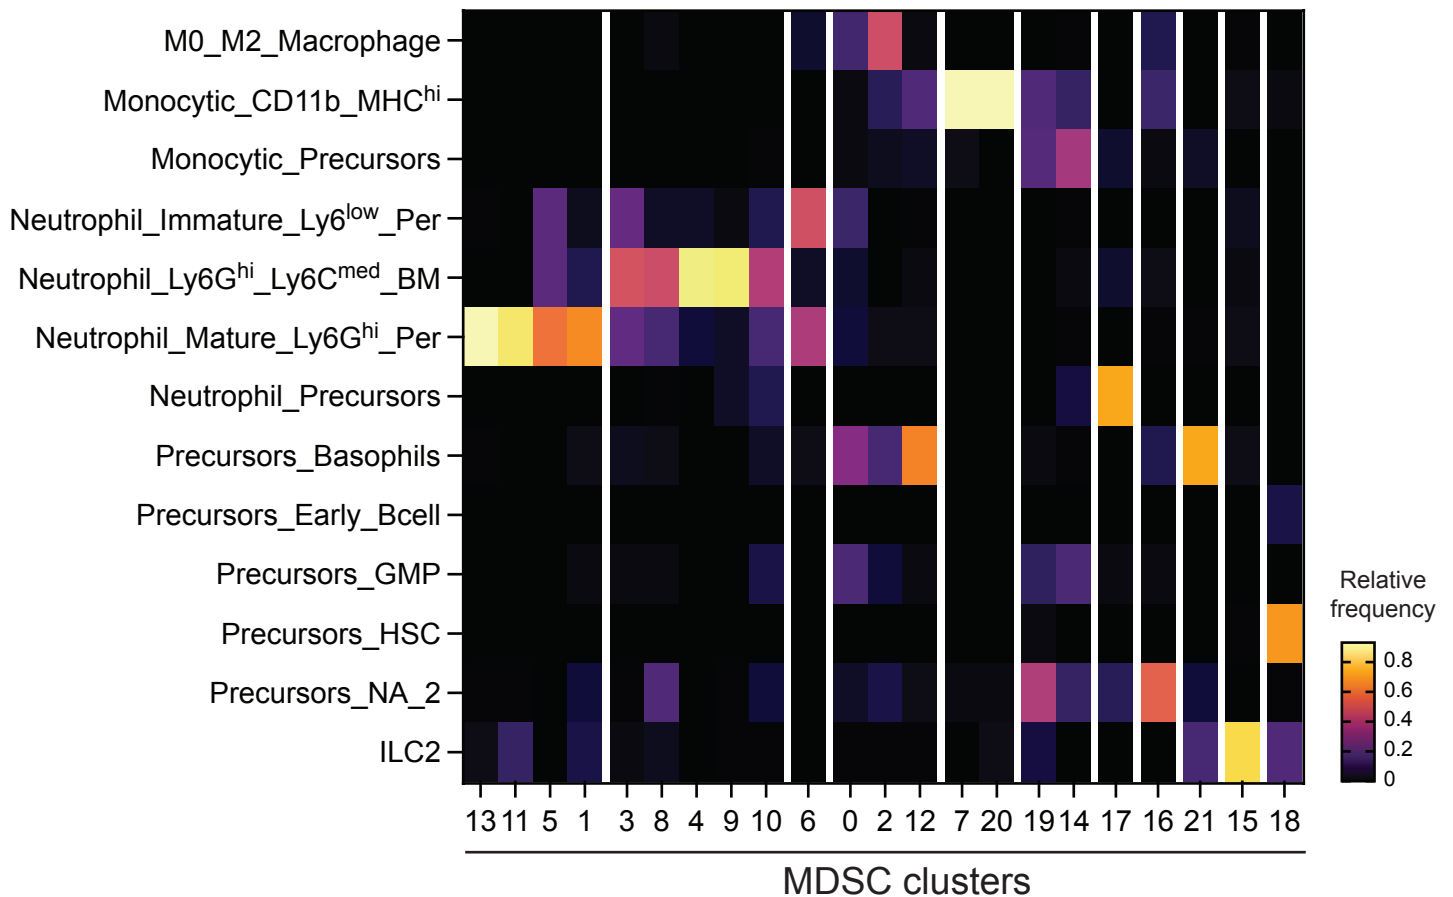

**Supplementary Figure s2.** Cluster annotation strategy. (A) UMAP plot representing the FastMNN-integrated scRNA data built from publicly available data sets (Supplemental Table D). The 26 resulting clusters were annotated based on the markers used in sorting strategy and the differentially expressed genes among clusters. Integrated MDSC scRNAseq data (contour lines) was projected onto the integrated reference data set using FindTransferAnchors. (B) Heatmap of the frequency of cells within each MDSC cluster that is projected onto the reference annotated groups. Scale represents relative frequency.
